# Supplementary material for: 2-(N,N-Diethylaminomethyl)-6,7-trihydroquinolinyl-8-ylideneamine-Ni(ii) chlorides: application in ethylene dimerization and trimerization
Source: Royal Society of Chemistry journal article supplement (doi:10.1039/d0nj04003g), 2020-01-01
Supplement: d0nj04003g1.pdf [file d0nj04003g1.pdf]

Supplementary Information

for

**2-(N,N-Diethylaminomethyl)-6,7-trihydroquinolinyl-8-ylideneamine-Ni(II) chlorides:**

**application in ethylene dimerization and trimerization**

Jiaxin Li, Yanping Ma, Xinquan Hu,\* Zygmunt Flisak,\* Tongling Liang, Wen-Hua Sun\*

† College of Chemical Engineering, Zhejiang University of Technology, Hangzhou 310014, China.

‡ Key Laboratory of Engineering Plastics and Beijing National Laboratory for Molecular Sciences, Institute of Chemistry, Chinese Academy of Sciences, Beijing 100190, China.

# CAS Research/Education Center for Excellence in Molecular Sciences and International School, University of Chinese Academy of Sciences, Beijing 100049, China.

‡ Department of Chemistry, University of Leicester, University Road, Leicester LE1 7RH, UK.

**\* Corresponding Authors**

\*E-mail: xinquan@zjut.edu.cn (X.-Q. H).

\*E-mail: whsun@iccas.ac.cn; Tel: +86-10-62557955; Fax: +86-10-62618239 (W.-H. S).

\*E-mail: gas8@leicester.ac.uk; Tel: +44-116-2522096 (G.A.S.)

| <b>Table of Contents</b>                                                                                                                                | <b>Page</b> |
|---------------------------------------------------------------------------------------------------------------------------------------------------------|-------------|
| 1. <b>Table S1</b> Crystal data and structure refinement details for <b>Ni1</b> and <b>Ni3</b>                                                          | S2          |
| 2. <b>Table S2</b> Selected bond lengths (Å) and angles (°) for <b>Ni1</b> and <b>Ni3</b>                                                               | S3          |
| 3. <b>Figure S1</b> Gas chromatograms of toluene                                                                                                        | S4          |
| 4. <b>Figure S2</b> Gas chromatograms using <b>Ni4</b> /MASC at 30 °C with toluene as the solvent(entry 4, Table 1)                                     | S4          |
| 5. <b>Figure S3</b> Gas chromatograms using <b>Ni4</b> /EASC (the EASC was diluted by n-hexane) at 30 °C with toluene as the solvent (entry 3, Table 1) | S5          |
| 6. <b>Figures S4 – S22</b> Gas chromatograms for the MAO-promoted runs ( <b>Ni</b> /MAO, Table 3).                                                      | S5-S11      |
| 7. <b>Figures S23 – S42</b> Gas chromatograms for MMAO-promoted ( <b>Ni</b> /MMAO, Table 2).                                                            | S12-S18     |

**Table S1** Crystal data and structure refinement details for **Ni1** and **Ni3**

|                                                 | <b>Ni1</b>                                                        | <b>Ni3</b>                                                        |
|-------------------------------------------------|-------------------------------------------------------------------|-------------------------------------------------------------------|
| Formula                                         | C <sub>22</sub> H <sub>29</sub> Cl <sub>2</sub> N <sub>3</sub> Ni | C <sub>26</sub> H <sub>37</sub> Cl <sub>2</sub> N <sub>3</sub> Ni |
| Formula weight                                  | 465.09                                                            | 521.19                                                            |
| T (K)                                           | 169.99(11)                                                        | 170.00(11)                                                        |
| Wavelength (Å)                                  | 0.71073                                                           | 0.71073                                                           |
| Crystal system                                  | monoclinic                                                        | triclinic                                                         |
| Space group                                     | P2 <sub>1</sub> /c                                                | P $\bar{1}$                                                       |
| a (Å)                                           | 17.0468(2)                                                        | 9.5112(2)                                                         |
| b (Å)                                           | 8.48720(10)                                                       | 10.9618(3)                                                        |
| c (Å)                                           | 15.8299(2)                                                        | 12.9408(2)                                                        |
| $\alpha$ /°                                     | 90                                                                | 94.937(2)                                                         |
| $\beta$ /°                                      | 107.7540(10)                                                      | 95.5750(10)                                                       |
| $\gamma$ /°                                     | 90                                                                | 92.089(2)                                                         |
| Volume/Å <sup>3</sup>                           | 2181.19(5)                                                        | 1336.48(5)                                                        |
| Z                                               | 4                                                                 | 2                                                                 |
| D <sub>calc</sub> (g cm <sup>-3</sup> )         | 1.416                                                             | 1.295                                                             |
| $\mu$ /mm <sup>-1</sup>                         | 3.623                                                             | 3.011                                                             |
| Crystal size/mm <sup>3</sup>                    | 0.50 × 0.20 × 0.150                                               | 0.5 × 0.3 × 0.25                                                  |
| $\theta$ Range (°)                              | 5.444 - 150.814                                                   | 8.014 – 151.                                                      |
| Limiting indices                                | -21 ≤ h ≤ 21<br>-10 ≤ k ≤ 10<br>-14 ≤ l ≤ 19                      | -12 ≤ h ≤ 12,<br>-11 ≤ k ≤ 12,<br>-16 ≤ l ≤ 15                    |
| No. of rflns collected                          | 17597                                                             | 16013                                                             |
| No. unique rflns [R(int)]                       | 4381 (0.0300)                                                     | 5313 (0.0198)                                                     |
| Data/restraints/parameters                      | 4381/0/257                                                        | 5313/0/295                                                        |
| Goodness of fit on $F^2$                        | 1.145                                                             | 1.112                                                             |
| Final R indices [ $I > 2\sigma(I)$ ]            | R <sub>1</sub> = 0.0328<br>wR <sub>2</sub> = 0.0880               | R <sub>1</sub> = 0.0293<br>wR <sub>2</sub> = 0.0782               |
| R indices (all data)                            | R <sub>1</sub> = 0.0391<br>wR <sub>2</sub> = 0.1124               | R <sub>1</sub> = 0.0339<br>wR <sub>2</sub> = 0.0886               |
| Largest diff peak and hole (e Å <sup>-3</sup> ) | 0.31 and -0.51                                                    | 0.28 and -0.36                                                    |

**Table 2** Selected bond lengths (Å) and angles (°) for **Ni1** and **Ni3**

|             | <b>Ni1</b>   | <b>Ni3</b>  |
|-------------|--------------|-------------|
|             | Bond lengths |             |
| Ni1-N1      | 2.1669(17)   | 2.2040(14)  |
| Ni1-N2      | 1.9752(17)   | 1.9868(13)  |
| Ni1-N3      | 2.1804(18)   | 2.1905(13)  |
| Ni1-Cl1     | 2.3234(6)    | 2.2893(5)   |
| Ni1-Cl2     | 2.2445(6)    | 2.2434(4)   |
| N2-C10      | 1.344(3)     | 1.344(2)    |
| N2-C2       | 1.321(3)     | 1.325(2)    |
| N3-C11      | 1.437(3)     | 1.445(2)    |
| N3-C9       | 1.283(3)     | 1.285(2)    |
|             | Bond angles  |             |
| Cl1-Ni1-Cl2 | 108.40(2)    | 110.193(19) |
| N2-Ni1-Cl1  | 93.63(5)     | 94.28(4)    |
| N2-Ni1-Cl2  | 157.91(6)    | 155.52(4)   |
| N2-Ni1-N3   | 76.87(7)     | 77.02(5)    |
| N2-Ni1-N1   | 79.92(7)     | 79.19(5)    |
| N3-Ni1-Cl1  | 98.07(5)     | 99.47(4)    |
| N3-Ni1-Cl2  | 97.95(5)     | 98.49(4)    |
| N3-Ni1-N1   | 101.32(5)    | 151.97(5)   |
| N1-Ni1-Cl1  | 96.74(5)     | 96.87(4)    |
| N1-Ni1-Cl2  | 150.52(7)    | 97.02(4)    |

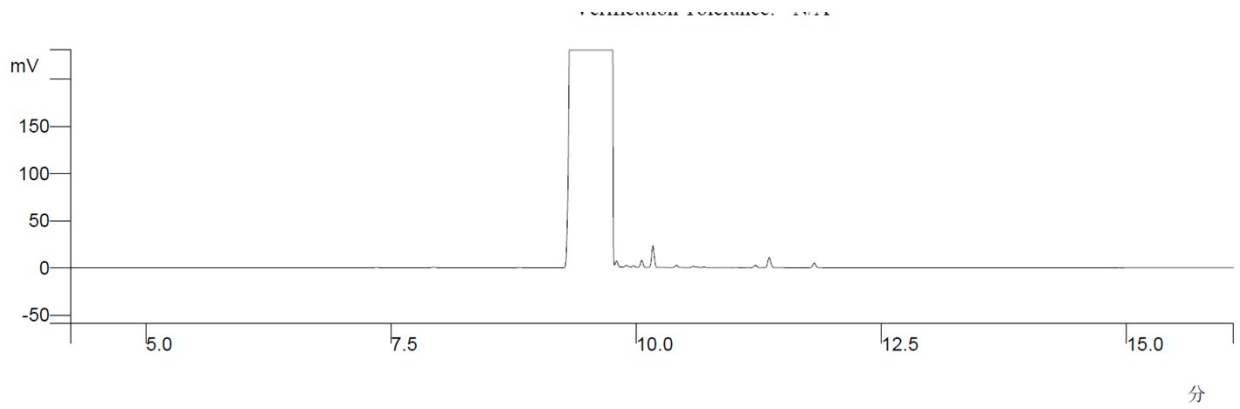

| Peak No | Peak Name | Result () | Ret. Time (min) | Time Offset (min) | Area (counts) | Rel Ret Time | Sep. Code | Width 1/2 (sec) | Status Codes | Group |
|---------|-----------|-----------|-----------------|-------------------|---------------|--------------|-----------|-----------------|--------------|-------|
| 1       |           | 100.0000  | 9.732           | 0.000             | 95378208      | 0.00         | BB        | 9.1             |              | 0     |
|         | 总数        | 100.0000  |                 | 0.000             | 95378208      |              |           |                 |              |       |

**Figure S1** Gas chromatograms of toluene

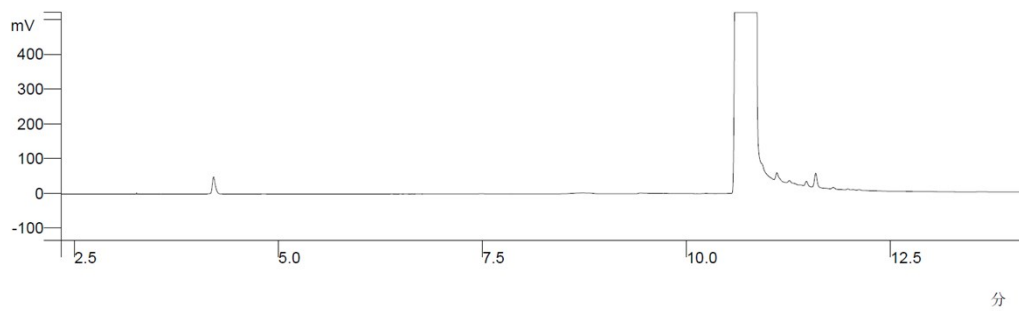

| Peak No | Peak Name | Result () | Ret. Time (min) | Time Offset (min) | Area (counts) | Rel Ret Time | Sep. Code | Width 1/2 (sec) | Status Codes | Group |
|---------|-----------|-----------|-----------------|-------------------|---------------|--------------|-----------|-----------------|--------------|-------|
| 1       |           | 0.0814    | 4.207           | 0.000             | 130850        | 0.00         | BB        | 2.3             |              | 0     |
| 2       |           | 99.9186   | 10.810          | 0.000             | 160540112     | 0.00         | PB        | 8.4             |              | 0     |
|         | 总数        | 100.0000  |                 | 0.000             | 160670960     |              |           |                 |              |       |

**Figure S2** Gas chromatograms of Ni4/MASC at 30 °C with toluene as the solvent (entry 3, Table 1)

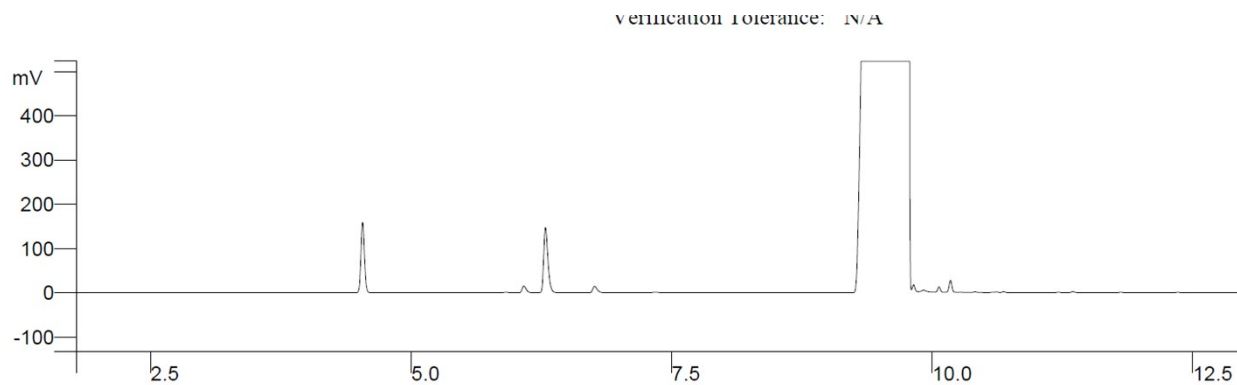

| Peak No | Peak Name | Result () | Ret. Time (min) | Time Offset (min) | Area (counts) | Rel Ret Time | Sep. Code | Width 1/2 (sec) | Status Codes | Grou |
|---------|-----------|-----------|-----------------|-------------------|---------------|--------------|-----------|-----------------|--------------|------|
| 1       |           | 0.3231    | 4.534           | 0.000             | 371333        | 0.00         | BB        | 2.2             |              | 0    |
| 2       |           | 0.3582    | 6.290           | 0.000             | 411661        | 0.00         | PB        | 2.5             |              | 0    |
| 3       |           | 99.3186   | 9.752           | 0.000             | 114127488     | 0.00         | PB        | 13.7            |              | 0    |

**Figure S3** Gas chromatograms of using **Ni4**/EASC at 30 °C with toluene as the solvent (entry 4, Table 1)

**Figures S4 – S22 Gas chromatograms for the MAO-promoted runs (Ni/MAO, Table 3):**

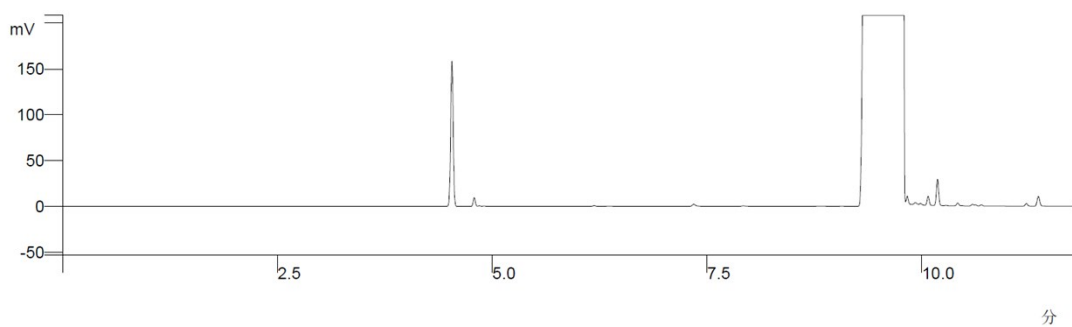

**Figure S4** Gas chromatogram obtained using **Ni4**/MAO at 30 °C; Al:Ni = 1000 (entry 1, Table 2).

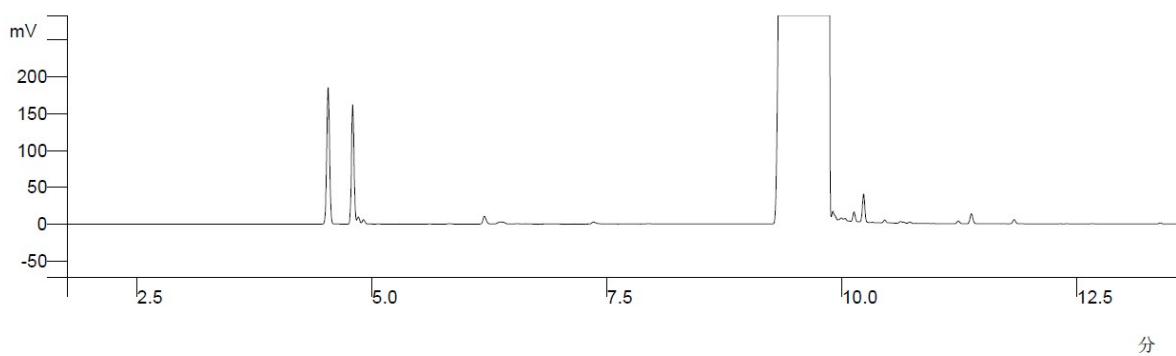

**Figure S5** Gas chromatogram obtained using Ni4/MAO at 30 °C; Al:Ni = 1250(entry 2, Table 3).

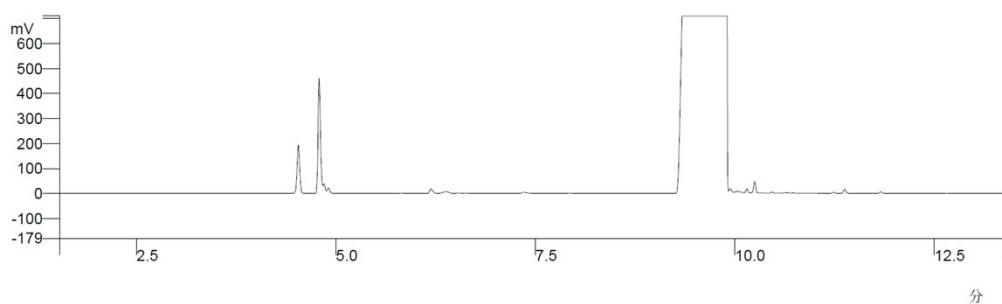

**Figure S6** Gas chromatogram obtained using Ni4/MAO at 30 °C; Al:Ni = 1500 (entry 3, Table 3).

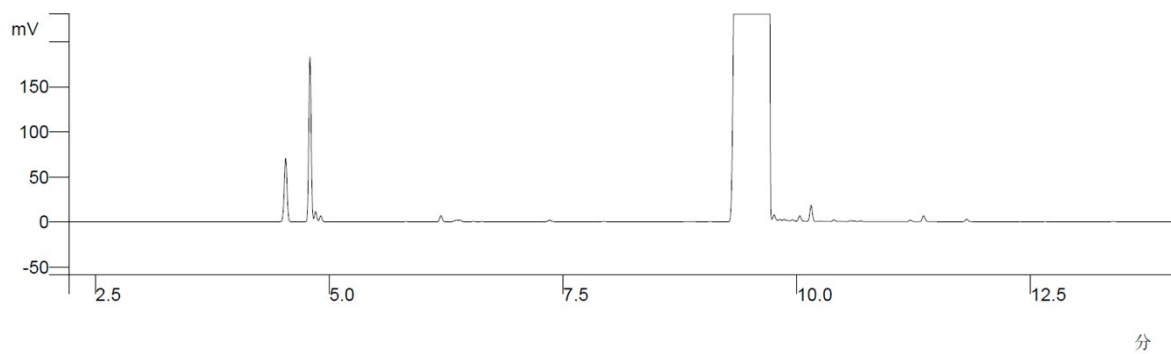

**Figure S7** Gas chromatogram obtained using Ni4/MAO at 30 °C; Al:Ni = 1750(entry 4, Table 3).

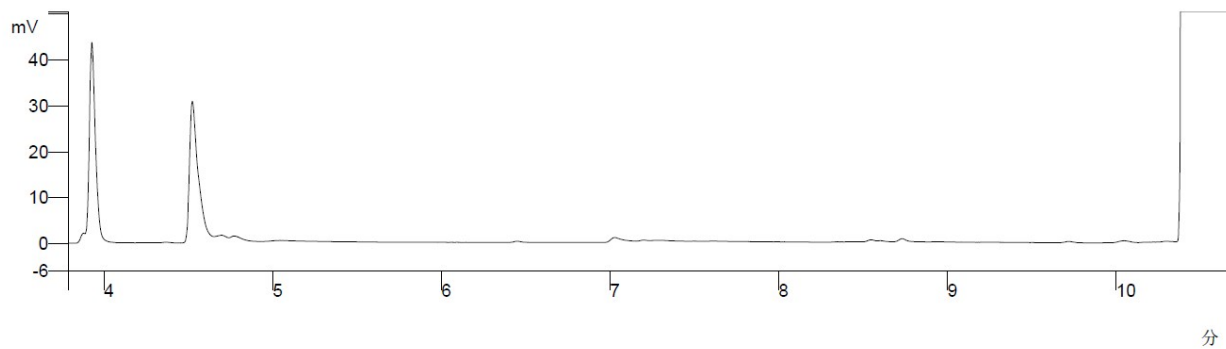

**Figure S8** Gas chromatogram obtained using **Ni4/MAO** at 30 °C; Al:Ni = 2000(entry 5, Table 3).

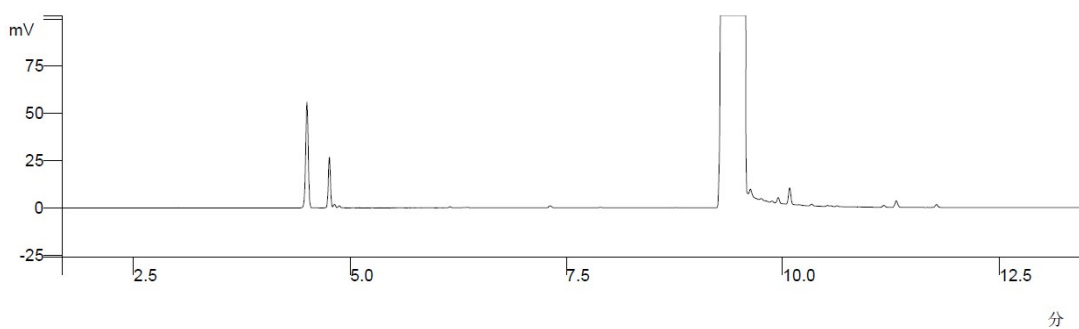

**Figure S9** Gas chromatogram obtained using **Ni4/MAO** at 30 °C; Al:Ni = 2500 (entry 6, Table 3).

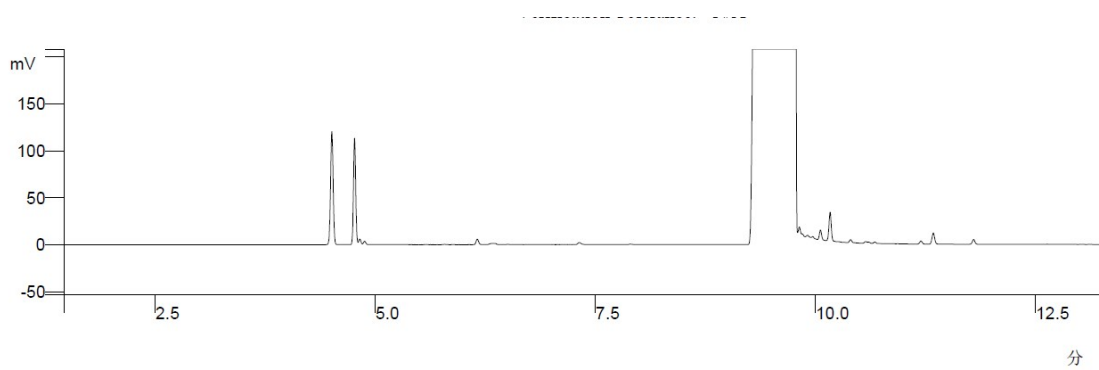

**Figure S10** Gas chromatogram obtained using **Ni4/MAO** at 20 °C (entry 7, Table 3).

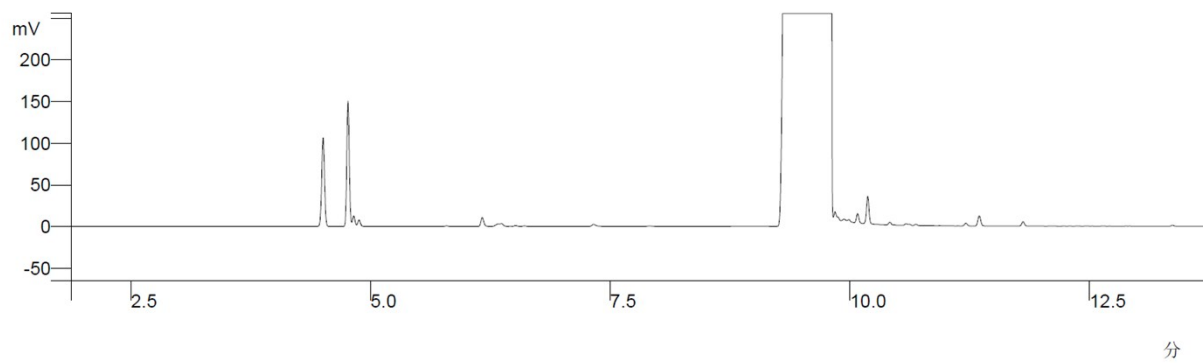

**Figure S11** Gas chromatogram obtained using Ni4/MAO at 40 °C (entry 8, Table 3).

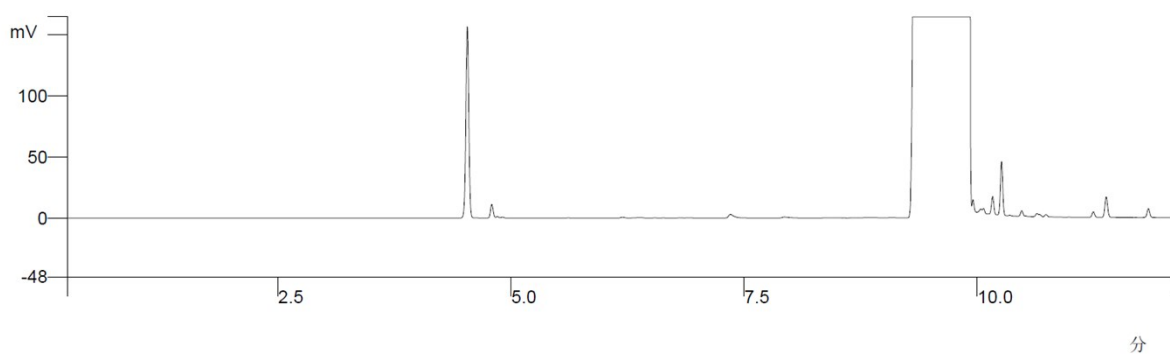

**Figure S12** Gas chromatogram obtained using Ni4/MAO at 50 °C (entry 9, Table 3).

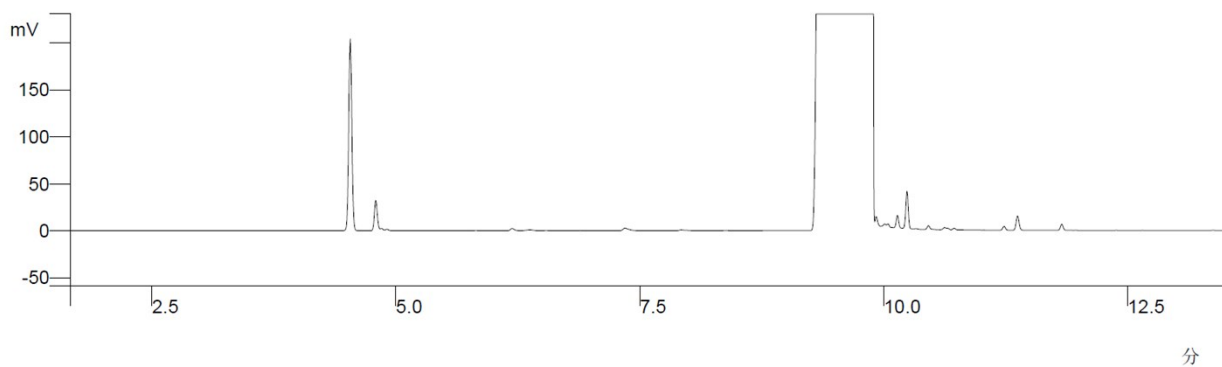

**Figure S13** Gas chromatogram obtained using Ni4/MAO at 30 °C; 5 min (entry 10, Table 3).



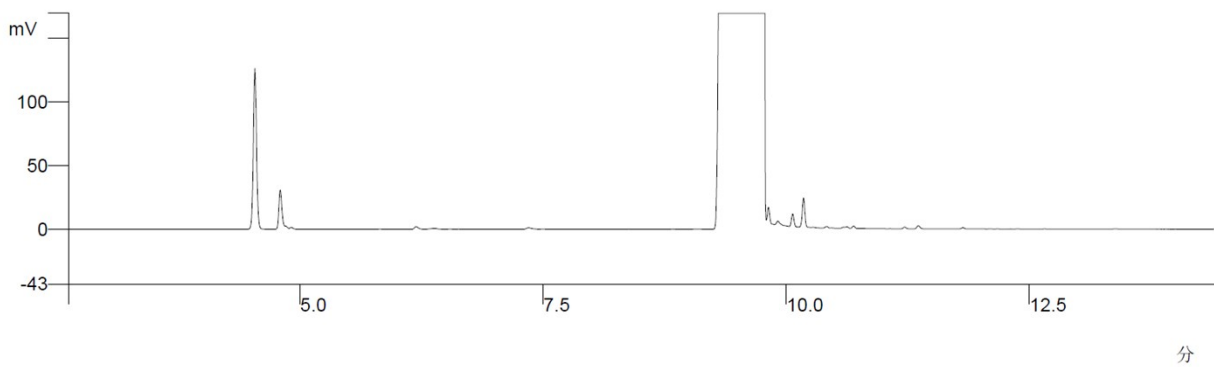

**Figure S14** Gas chromatograms obtained using Ni4/MAO at 30 °C; 15 min (entry 11, Table 3).

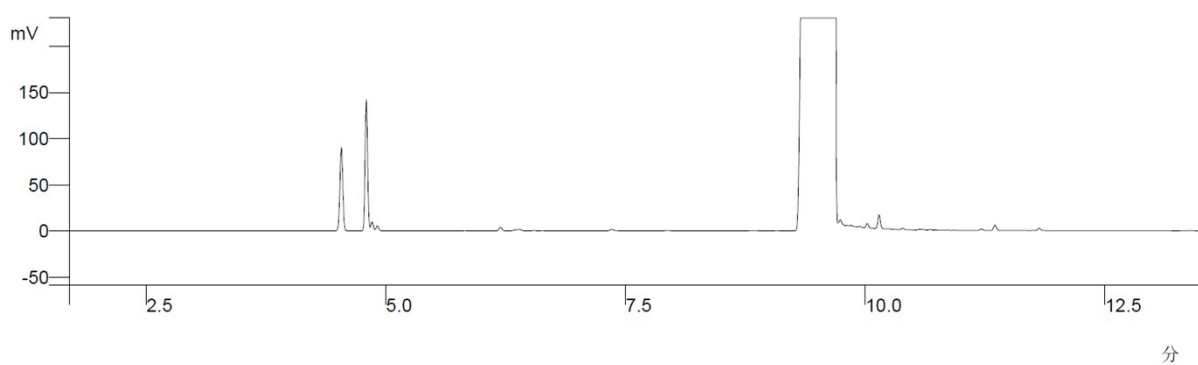

**Figure S15** Gas chromatogram obtained using Ni4/MAO at 30 °C; 45 min (entry 12, Table 3).

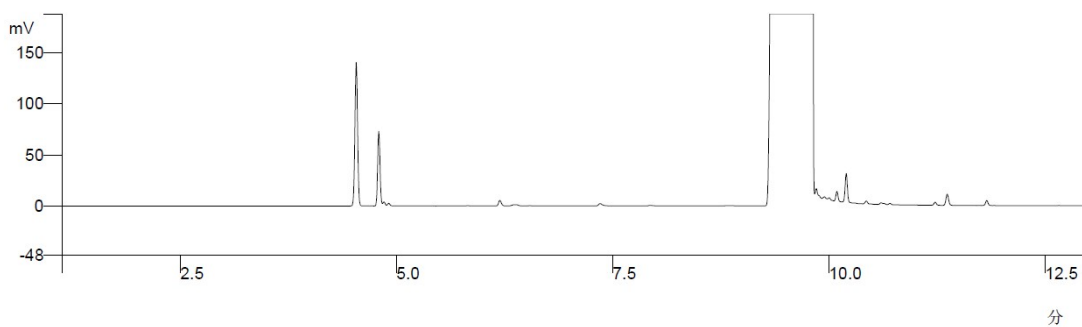

**Figure S16** Gas chromatogram obtained using Ni4/MAO at 30 °C; 60 min (entry 13, Table 3).

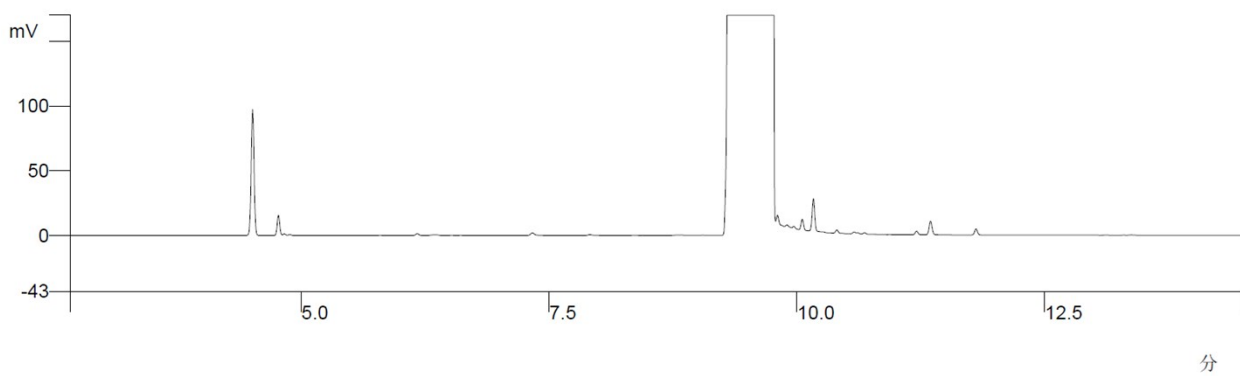

**Figure S17** Gas chromatogram obtained using **Ni4/MAO** at 30 °C; 5 atm C<sub>2</sub>H<sub>4</sub> (entry 14, Table 3).

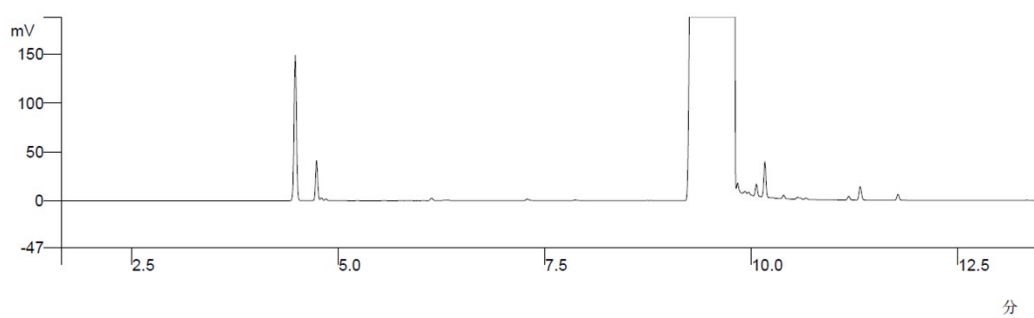

**Figure S18** Gas chromatogram obtained using **Ni1/MAO** at 30 °C (entry 15, Table 3).

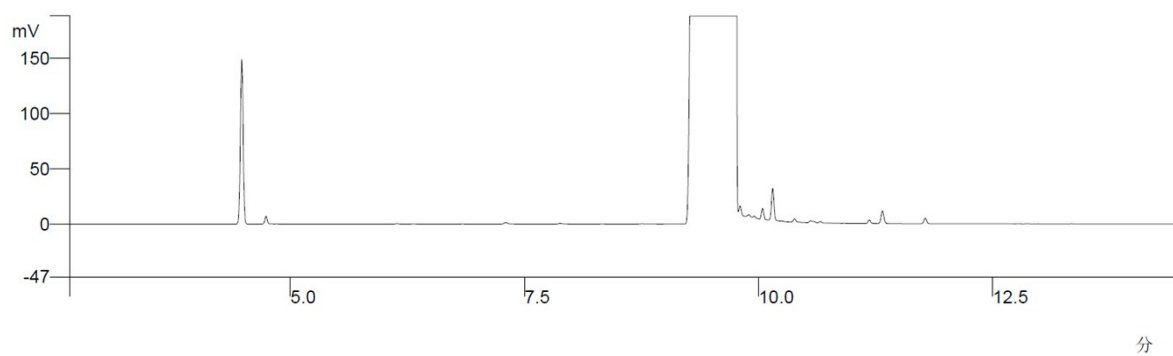

**Figure S19** Gas chromatogram obtained using **Ni2/MAO** at 30 °C (entry 16, Table 3).

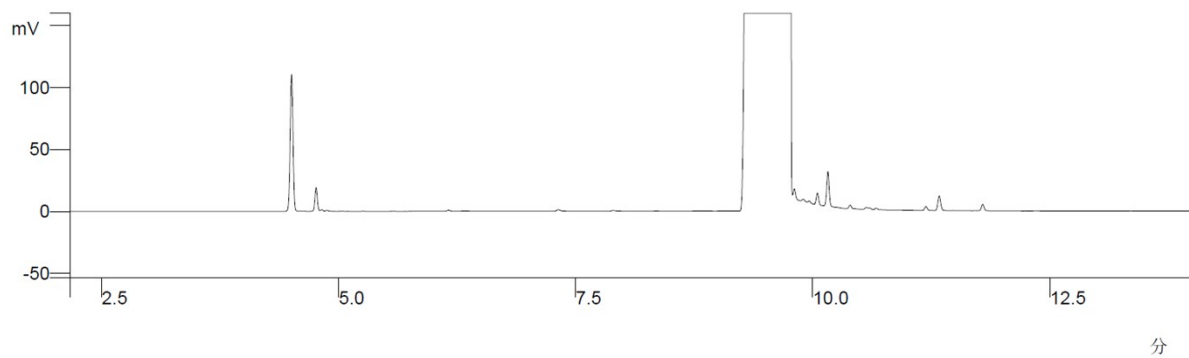

**Figure S20** Gas chromatogram obtained using **Ni3/MAO** at 30 °C (entry 17, Table 3).

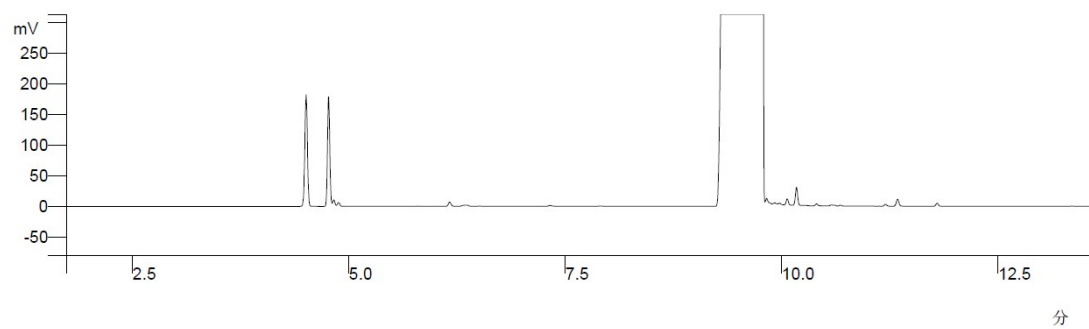

**Figure S21** Gas chromatogram obtained using **Ni5/MAO** at 30 °C (entry 18, Table 3).

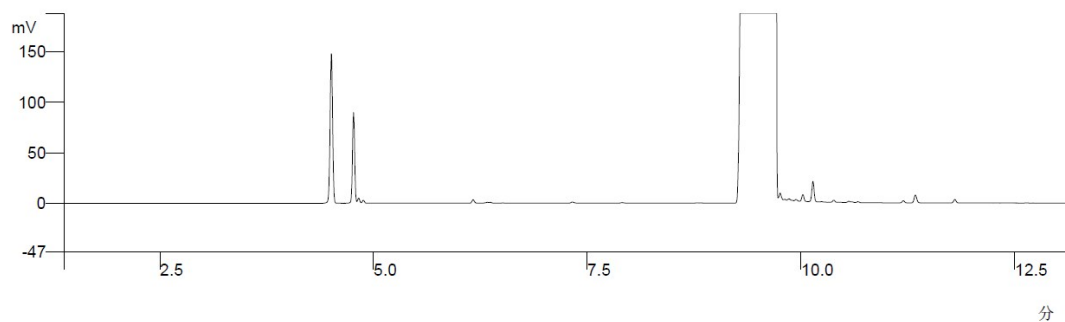

**Figure S22** Gas chromatogram obtained using **Ni6/MAO** at 30 °C (entry 19, Table 3).

**Figures S23 – S43 Gas chromatograms for the MMAO-promoted runs (Ni/MMAO, Table 2):**

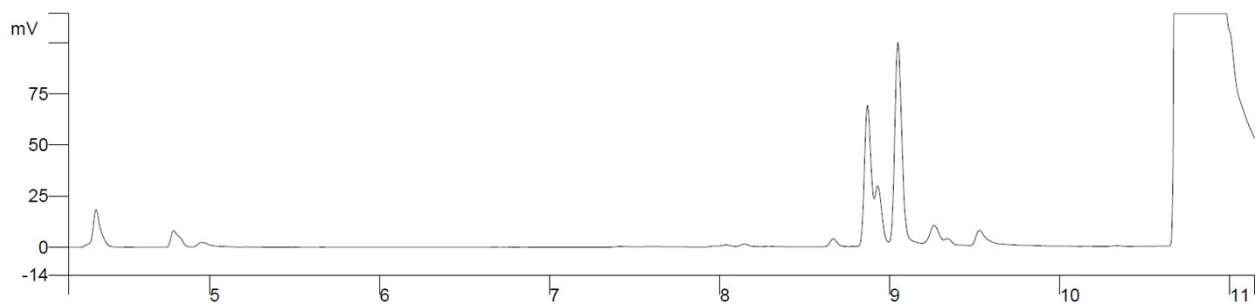

**Figure S23** Gas chromatogram obtained using Ni4/MMAO at 30 °C; Al:Ni = 1500 (entry 1, T Table 2).

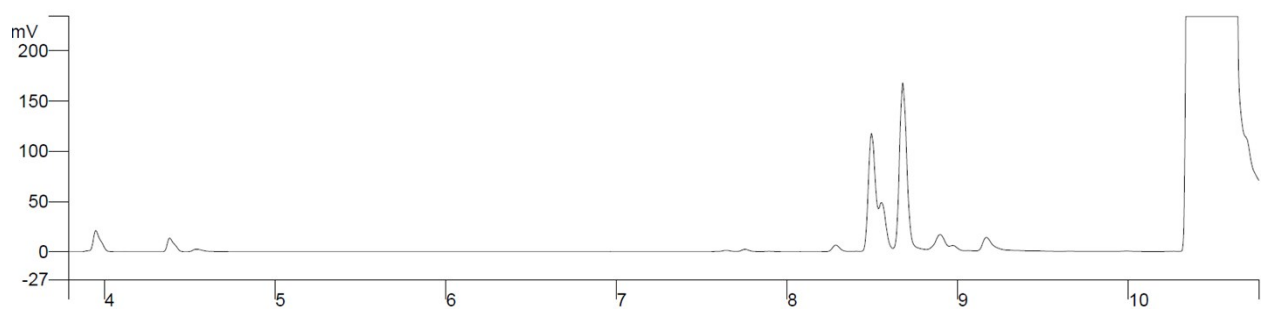

**Figure S24** Gas chromatogram obtained using Ni4/MMAO at 30 °C; Al:Ni = 2000 (entry 2, Table 2).

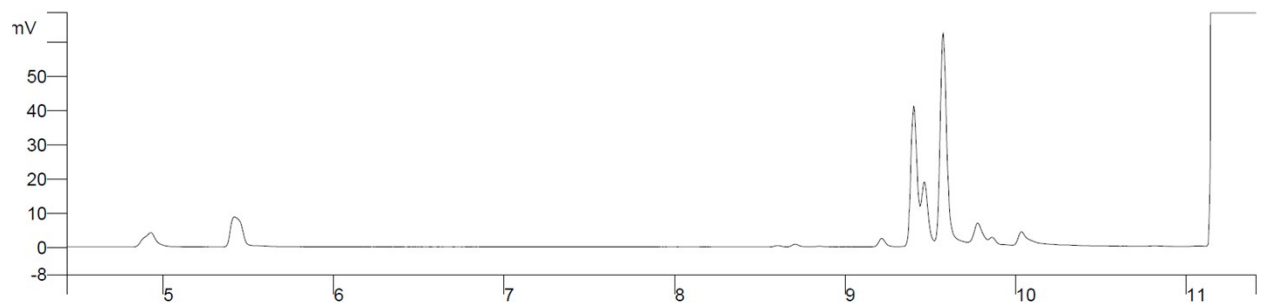

**Figure S25** Gas chromatogram obtained using Ni4/MMAO at 30 °C; Al:Ni = 2250 (entry 3, Table 2).

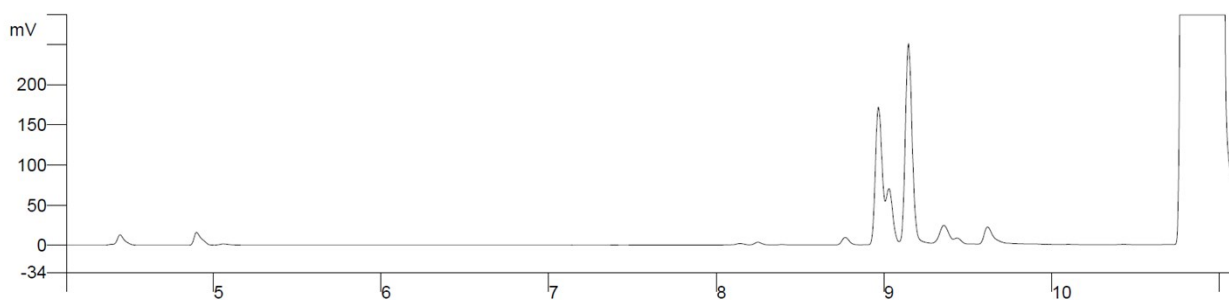

**Figure S26** Gas chromatogram obtained using Ni4/MMAO at 30 °C; Al:Ni = 2500 (entry 4, Table 2).

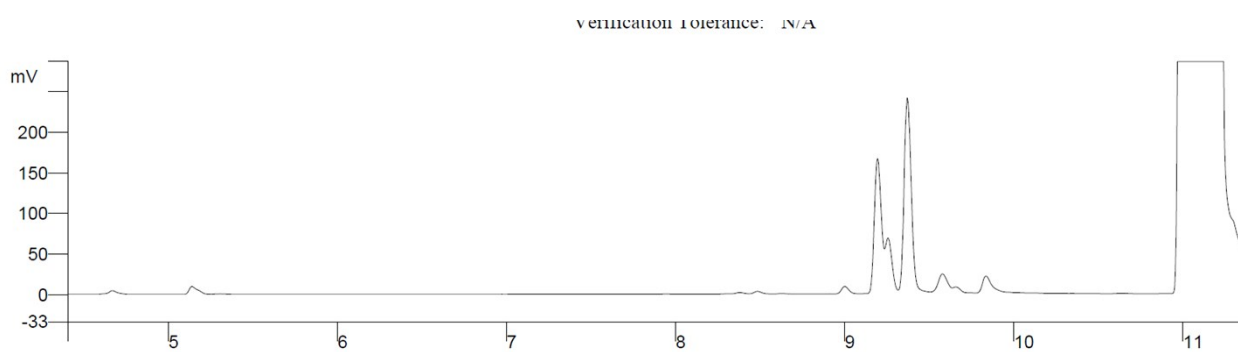

**Figure S27** Gas chromatogram obtained using using Ni4/MMAO at 30 °C; Al:Ni = 2750 (entry 5, Table 2).

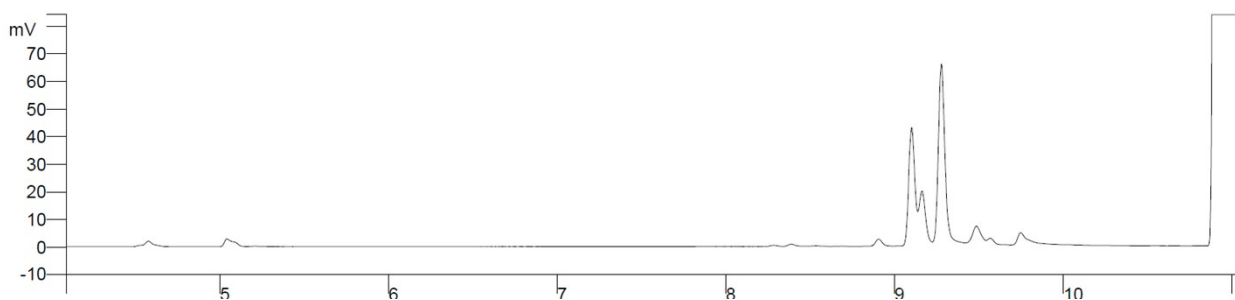

**Figure S28** Gas chromatogram obtained using Ni4/MMAO at 30 °C; Al:Ni =3000 (entry 6, Table 2).

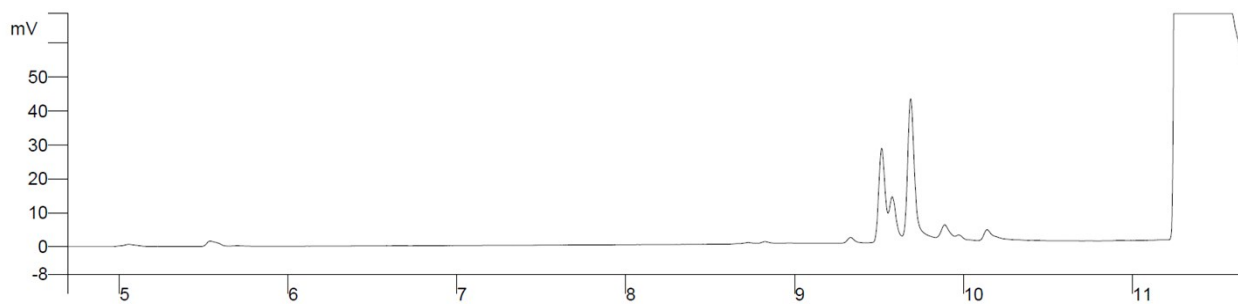

**Figure S29** Gas chromatogram obtained using Ni4/MMAO at 20 °C (entry 7, Table 2).

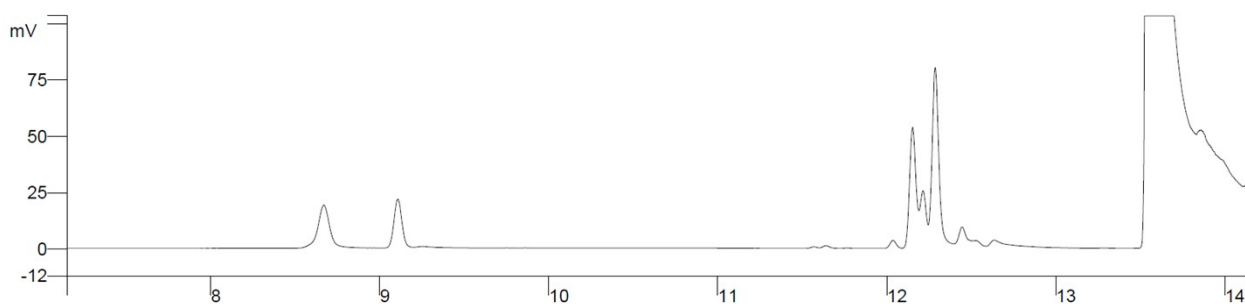

**Figure S30** Gas chromatogram obtained using Ni4/MMAO at 40 °C (entry 8, Table 2).

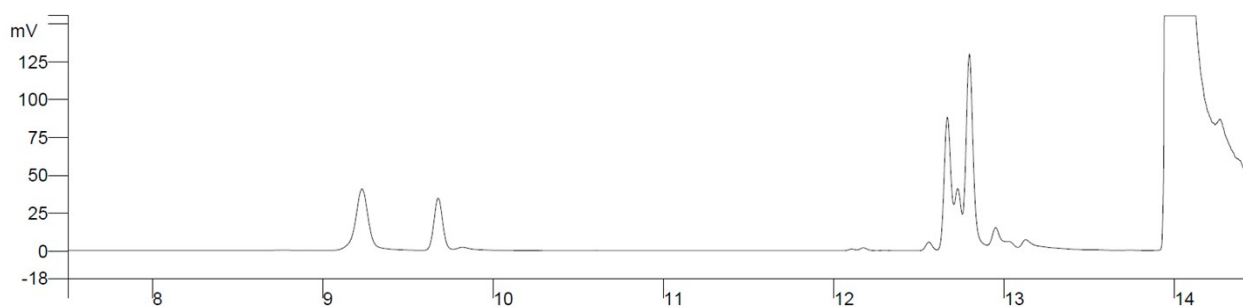

**Figure S31** Gas chromatogram obtained using Ni4/MMAO at 50 °C (entry 9, Table 2).

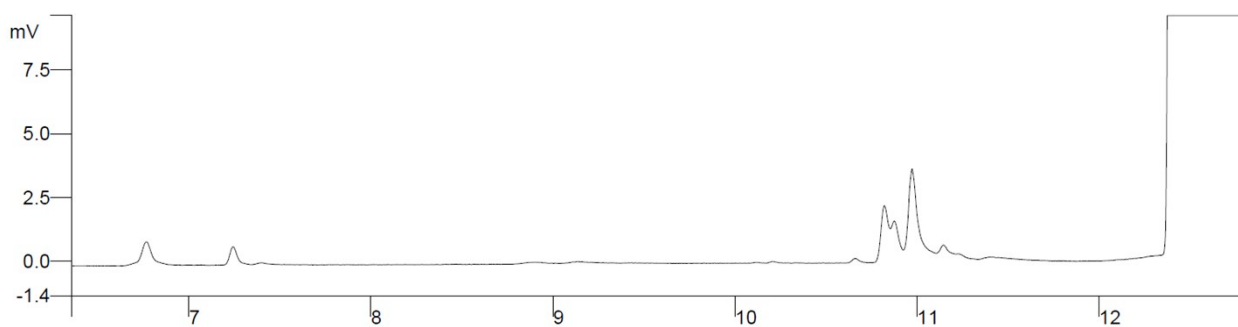

**Figure S32** Gas chromatogram obtained using Ni4/MMAO at 60 °C (entry 10, Table 2).

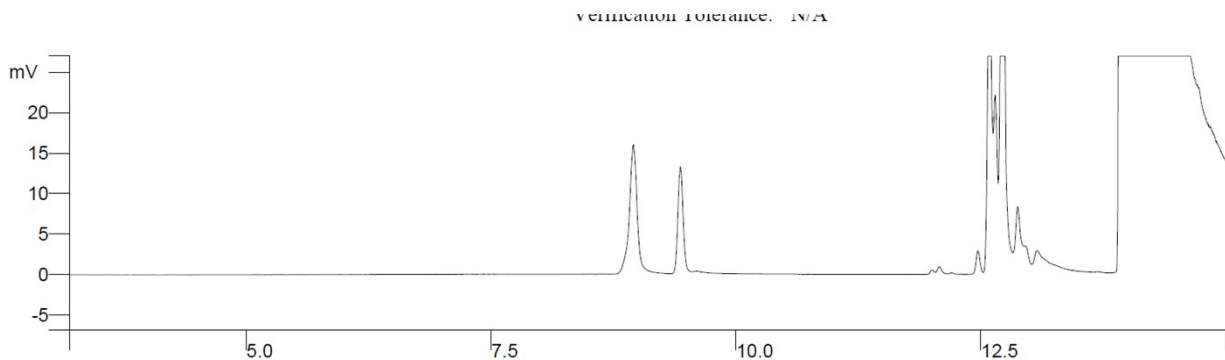

**Figure S33** Gas chromatogram obtained using Ni4/MMAO at 30 °C; 5 min (entry 11, Table 2).

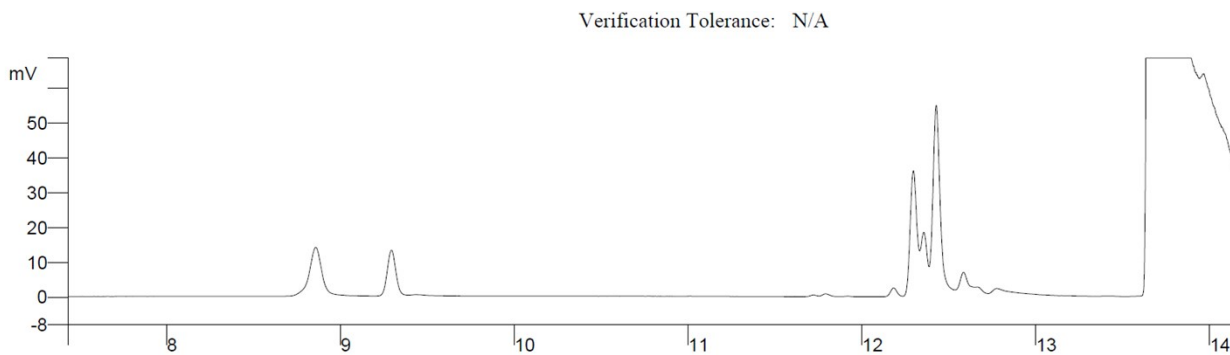

**Figure S34** Gas chromatogram obtained using Ni4/MMAO at 30 °C; 15 min (entry 12, Table 2).

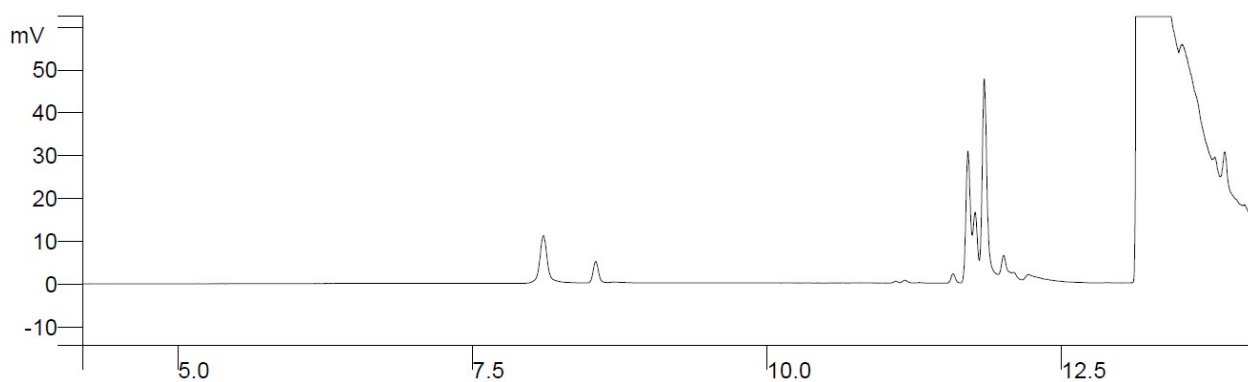

**Figure S35** Gas chromatogram obtained using Ni4/MMAO at 30 °C; 45 min (entry 13, Table 2).

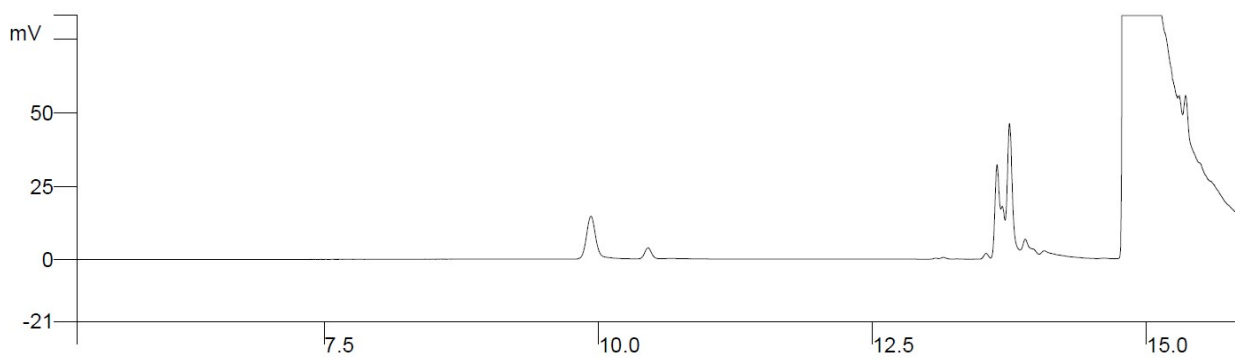

**Figure S36** Gas chromatogram obtained using Ni4/MMAO at 30 °C; 60 min (entry 14, Table 2).

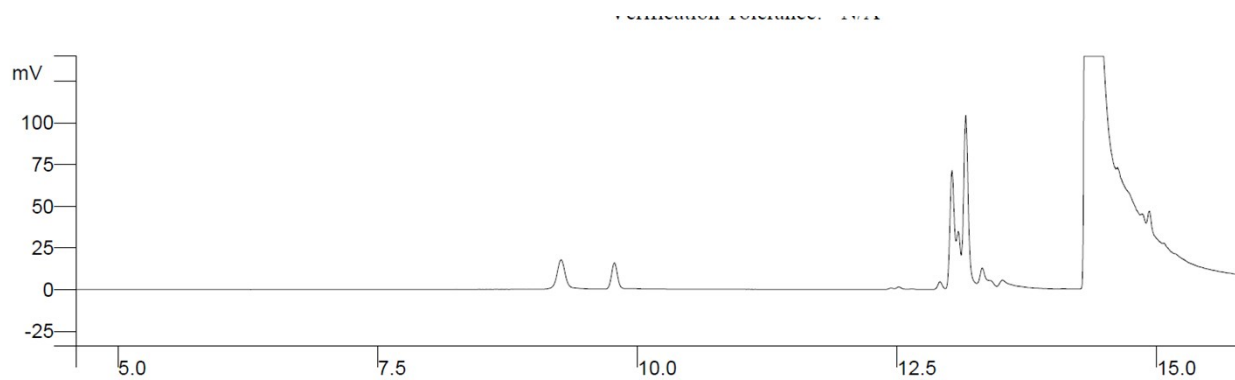

**Figure S37** Gas chromatogram obtained using Ni4/MMAO at 30 °C; 5 atm C<sub>2</sub>H<sub>4</sub> (entry 15, Table 2).

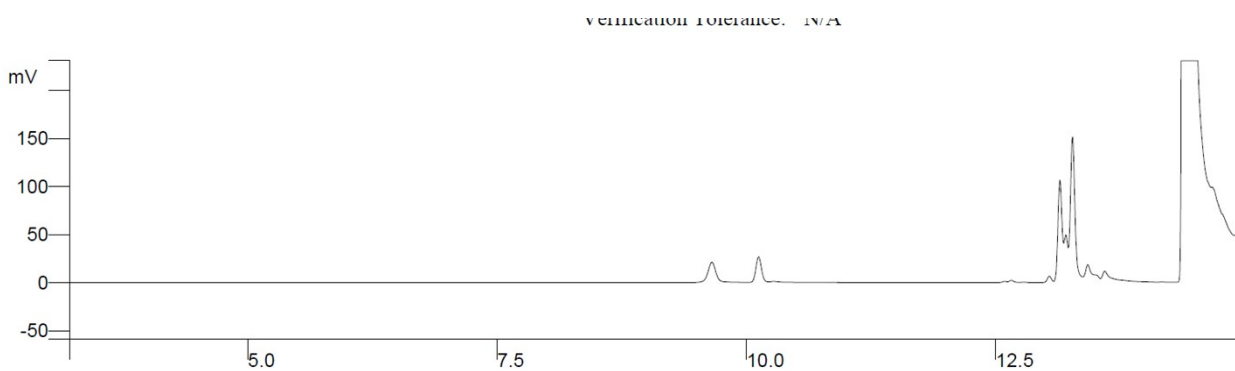

**Figure S38** Gas chromatogram obtained using Ni1/MMAO at 30 °C (entry 16, Table 2).



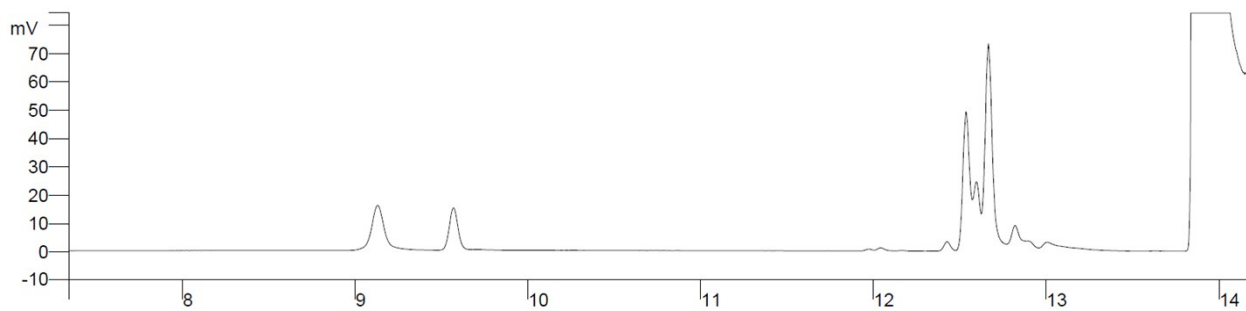

**Figure S39** Gas chromatogram obtained using **Ni2/MMAO** at 30 °C (entry 17, Table 2).

Verification Tolerance: N/A

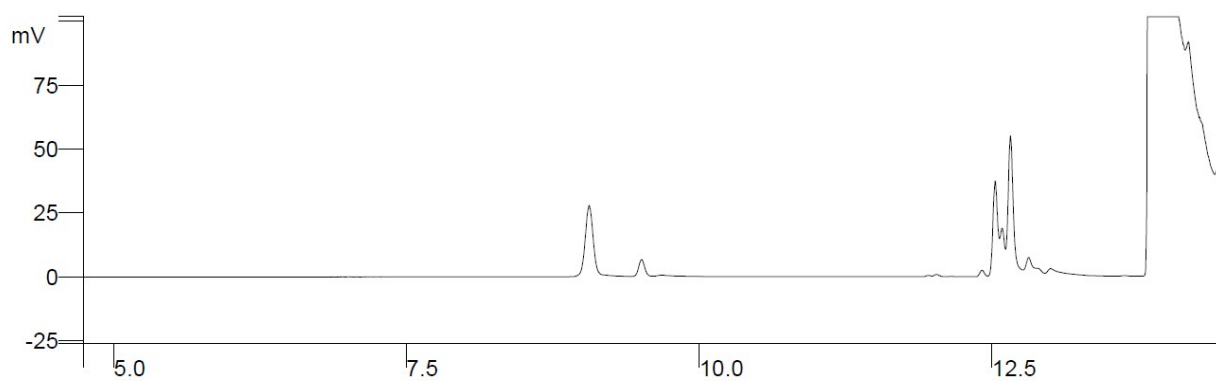

**Figure S40** Gas chromatogram obtained using **Ni3/MMAO** at 30 °C (entry 18, Table 2).

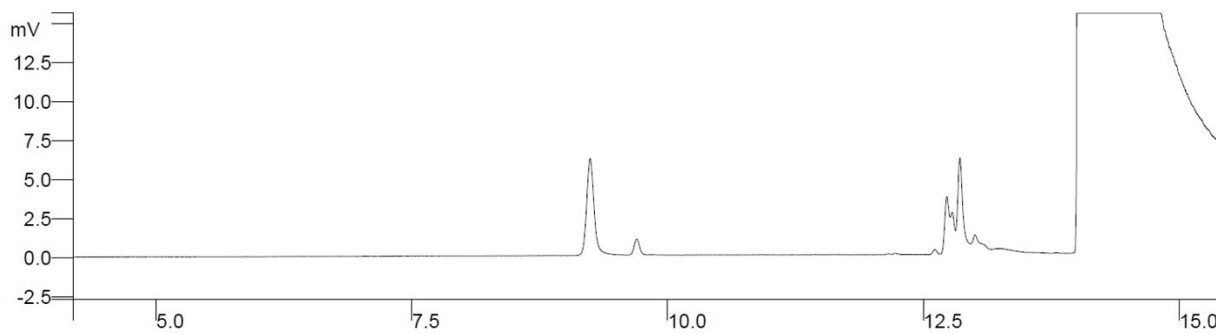

**Figure S41** Gas chromatogram obtained using **Ni5/MMAO** at 30 °C (entry 19, Table 2).

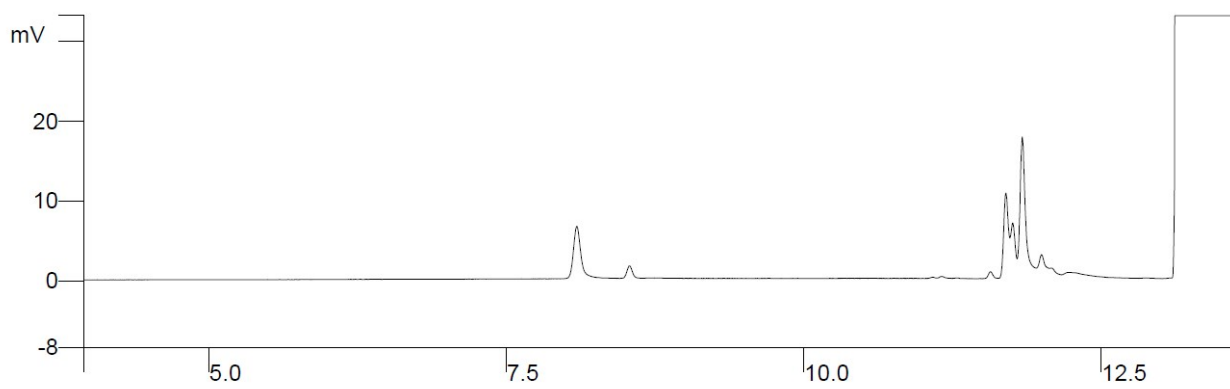

**Figure S42** Gas chromatogram obtained using Ni6/MMAO at 30 °C (entry 20, Table 2).
